# Supplementary material
Source: PubMed Central journal article supplement (PMC3326494)
Supplement: 1202829109_pnas.201202829SI.pdf [file 1202829109_pnas.201202829SI.pdf]

# Supporting Information

McKinney et al. 10.1073/pnas.1202829109

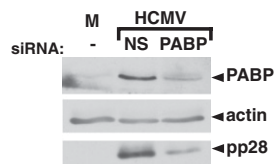

**Fig. S1.** Preventing the virus-induced increase in poly(A) binding protein (PABP) concentration suppresses pp28 accumulation in asynchronous normal human dermal fibroblasts (NHDFs) infected with human cytomegalovirus (HCMV). Asynchronous NHDFs were transiently transfected with control, nonsilencing siRNA (NS), PABP siRNA (+), or no siRNA (–). After 48 h posttransfection, cells were either mock-infected (M) or infected with HCMV AD169 (multiplicity of infection = 5). Total protein was harvested at 48 hpi, fractionated by SDS/PAGE, and analyzed by immunoblotting using the indicated antisera (*Right*).
